# Supplementary material
Source: publisher figshare collection journal article supplement (https://acs.figshare.com/ndownloader/files/6949259)
Supplement: Supplementary file 1 [file 6949259]

# Supporting Information

## **Reduced Graphene Oxide based ‘Turn-On’ Fluorescence Sensor for Highly Reproducible and Sensitive Detection of Small Organic Pollutants**

*Reetam Mitra<sup>†</sup> and Arindam Saha\*<sup>‡</sup>*

<sup>†</sup> Department of Chemical Engineering, Jadavpur University, 188, Raja S. C. Mallick Road, West Bengal, Kolkata-700032, India

<sup>‡</sup> Sensor and Actuator Division, CSIR-Central Glass and Ceramic Research Institute, 196, Raja S. C. Mallick Road, West Bengal, Kolkata-700032, India

\*Address correspondence to [arindamchemiitkgp@gmail.com](mailto:arindamchemiitkgp@gmail.com)

There are totally 15 pages, with 10 Figures and 4 Tables in the Supporting Information.

**Table S1:** Comparison of the existing methods of bisphenol A (BPA) detection.

| Pollutant Detected               | Materials Used                                        | Methods of Detection           | Limit of Detection         | Range of Response                              | Selectivity                                                                                | Reproducibility and stability                                                          | Disadvantages                                                         | Reference |
|----------------------------------|-------------------------------------------------------|--------------------------------|----------------------------|------------------------------------------------|--------------------------------------------------------------------------------------------|----------------------------------------------------------------------------------------|-----------------------------------------------------------------------|-----------|
| BPA                              | C <sub>8</sub> and C <sub>18</sub> column             | HPLC-ED (Coulometry)           | $\sim 10^{-9}$ M           | $\sim 10^{-10}$ M to $\sim 10^{-7}$ M          | Not shown                                                                                  | RSD $\leq 3\%$<br>Stability not discussed                                              | Complex technique, long pre-processing time                           | 26        |
| BPA                              | Au-Pd nanoparticle/graphene composite                 | ED                             | $\sim 4 \times 10^{-9}$ M  | $\sim 10^{-8}$ M to $\sim 10^{-6}$ M           | Selective against ions and few Phenolic compounds tested                                   | RSD = 2.6 %<br>Stable for $\sim 7$ days with increase in RSD to 3.8 %                  | Complex fabrications, long pre-processing time                        | 27        |
| BPA                              | Cyclodextrin modified ionic liquid based carbon paste | ED (Voltammetry and impedance) | $\sim 8 \times 10^{-8}$ M  | $\sim 10^{-7}$ M to $\sim 10^{-5}$ M           | Selective against ions and few Phenolic compounds tested                                   | RSD = $\sim 5\%$<br>Stable for one month with 90% activity retained                    | Poor sensitivity, complex fabrications                                | 28        |
| BPA                              | Graphene-iron oxide composite                         | ED                             | $\sim 10^{-8}$ M           | $\sim 6 \times 10^{-8}$ M to $\sim 10^{-5}$ M  | Selective against ions and few Phenolic compounds tested. (phenol, naphthol can interfere) | RSD = 2.7 %<br>Stable for two weeks                                                    | Poor sensitivity, complex fabrications                                | 29        |
| BPA                              | Small fluorophore derivitized column                  | HPLC-fluorescence              | $\sim 10^{-10}$ M          | $\sim 10^{-10}$ M to $\sim 5 \times 10^{-9}$ M | Not shown                                                                                  | RSD = 8.7 %<br>Stability not discussed                                                 | Long processing time, complex fabrications and derivitization process | 30        |
| Estriol                          | Graphene                                              | 'Turn-On' Fluorescent Sensor   | $\sim 10^{-9}$ M           | $\sim 10^{-9}$ M to $\sim 10^{-8}$ M           | Selective against few biomolecules                                                         | Not discussed                                                                          | Poor reproducibility                                                  | 31        |
| BPA and other Phenolic compounds | Polymer materials                                     | HRGC-MS                        | $\sim 2 \times 10^{-14}$ M | Not shown                                      | Not shown                                                                                  | Not discussed                                                                          | Long processing time, complex fabrications                            | 32        |
| BPA                              | Standard HPLC columns                                 | LC-MS                          | $\sim 10^{-9}$ M           | Not shown                                      | Not shown                                                                                  | Not discussed                                                                          | Long processing time, complex fabrications, poor sensitivity          | 33        |
| BPA                              | Graphene-dextran-fluorescein composite                | 'Turn-On' Fluorescent Sensor   | $\sim 8 \times 10^{-12}$ M | $\sim 10^{-10}$ M to $\sim 10^{-6}$ M          | Selective against other molecules, ions and few Phenolic compounds tested                  | RSD $\leq 1\%$<br>Stable for more than six months with increase in RSD to $\sim 1.5\%$ |                                                                       | This Work |

**HPLC:** High Performance Liquid Chromatography**ED:** Electrochemical Detection**LC-MS:** Liquid Chromatography Mass Spectroscopy**HRGC-MS:** High Resolution Gas Chromatography Mass Spectroscopy**RSD:** Relative Standard Deviation

**Table S2:** Comparison of the existing methods of picric acid (PA) detection.

| Pollutant Detected | Materials Used                               | Methods of Detection                           | Limit of Detection                                 | Range of Response                     | Selectivity                                                               | Reproducibility and stability                                                          | Disadvantages                                           | Reference |
|--------------------|----------------------------------------------|------------------------------------------------|----------------------------------------------------|---------------------------------------|---------------------------------------------------------------------------|----------------------------------------------------------------------------------------|---------------------------------------------------------|-----------|
| Picric Acid        | Fluorescent polymer and metalloles           | 'Turn-Off' Fluorescent Sensor                  | $\sim 10^{-5}$ M                                   | Not shown                             | Not shown                                                                 | Not discussed                                                                          | Poor sensitivity, complex synthesis                     | 40        |
| Picric Acid        | Fluorescent polymer                          | 'Turn-Off' Fluorescent Sensor                  | $\sim 10^{-5}$ M                                   | Not shown                             | Selective towards other nitro aromatics                                   | Not discussed                                                                          | Poor sensitivity, complex synthesis                     | 42        |
| Picric Acid        | Fluorescent polymer                          | 'Turn-Off' Fluorescent Sensor                  | $\sim 10^{-5}$ M                                   | Not shown                             | Not shown                                                                 | Not discussed                                                                          | Poor sensitivity, complex synthesis                     | 43        |
| Picric Acid        | Fluorescent polymer                          | 'Turn-Off' Fluorescent Sensor                  | $\sim 10^{-5}$ M ( $\sim 10^{-12}$ M in TLC strip) | Not shown                             | Selective towards other nitro aromatics                                   | Not discussed                                                                          | Poor sensitivity, complex synthesis                     | 44        |
| Picric Acid        | Eu (III) based metal organic framework (MOF) | 'Turn-Off' Fluorescent Sensor                  | $\sim 10^{-7}$ M                                   | $\sim 10^{-5}$ M to $\sim 10^{-2}$ M  | Selective towards other nitro aromatics                                   | Not discussed                                                                          | Poor sensitivity and reproducibility, complex chemistry | 45        |
| Picric Acid        | Metallogel based MOF                         | 'Turn-On' Fluorescent and colorimetric sensing | $\sim 10^{-5}$ M                                   | Not shown                             | Selective towards other nitro aromatics                                   | Not discussed                                                                          | Poor sensitivity, complex synthesis                     | 46        |
| Picric Acid        | Chitosan                                     | 'Turn-Off' Fluorescent Sensor                  | $\sim 10^{-8}$ M                                   | Not shown                             | Selective towards other nitro aromatics                                   | Stable for six months. Reproducibility not discussed                                   | Poor sensitivity and reproducibility, complex synthesis | 47        |
| Picric Acid        | Fluorescent polysiloles                      | 'Turn-Off' Fluorescent Sensor                  | $\sim 10^{-7}$ M                                   | Not shown                             | Selective towards other nitro aromatics                                   | Not discussed                                                                          | Poor sensitivity and reproducibility                    | 48        |
| Picric Acid        | Small fluorophores                           | 'Turn-Off' Fluorescent Sensor                  | $\sim 10^{-6}$ M                                   | Not shown                             | Selective towards other nitro aromatics                                   | Not discussed                                                                          | Poor sensitivity and reproducibility                    | 49        |
| Picric Acid        | Small fluorophores                           | 'Turn-Off' Fluorescent Sensor                  | $\sim 10^{-14}$ M                                  | Not shown                             | Selective towards other nitro aromatics                                   | Not discussed                                                                          | Poor reproducibility, complex chemistry                 | 50        |
| Picric Acid        | Small fluorophores                           | 'Turn-Off' Fluorescent Sensor                  | $\sim 10^{-7}$ M                                   | Not shown                             | Selective towards other nitro aromatics                                   | Not discussed                                                                          | Poor sensitivity and reproducibility                    | 51        |
| Picric Acid        | Graphene oxide-methyl cellulose hybrid       | 'Turn-Off' Fluorescent Sensor                  | $\sim 10^{-6}$ M                                   | Not shown                             | Poor Selectivity as tested with other nitro aromatics                     | Not discussed                                                                          | Poor sensitivity                                        | 52        |
| Picric Acid        | Graphene oxide-pyridine hybrid               | 'Turn-Off' Fluorescent Sensor                  | $\sim 10^{-6}$ M                                   | Not shown                             | Selective towards other nitro aromatics                                   | Not discussed                                                                          | Poor sensitivity                                        | 53        |
| Picric Acid        | Carbon nanoparticle                          | 'Turn-Off' Fluorescent Sensor                  | $\sim 10^{-6}$ M                                   | Not shown                             | Selective towards other nitro aromatics                                   | Not discussed                                                                          | Poor sensitivity                                        | 55        |
| Picric Acid        | Graphene-dextran-fluorescein composite       | 'Turn-On' Fluorescent Sensor                   | $\sim 5 \times 10^{-12}$ M                         | $\sim 10^{-11}$ M to $\sim 10^{-6}$ M | Selective against other molecules, ions and few Phenolic compounds tested | RSD $\leq 1\%$<br>Stable for more than six months with increase in RSD to $\sim 1.5\%$ |                                                         | This Work |

**Table S3:** Comparison of the existing methods of 1-naphthol (NP) and phenol (PH) detection.

| Pollutant Detected | Materials Used                         | Methods of Detection                          | Limit of Detection         | Range of Response                                        | Selectivity                                                               | Reproducibility and stability                                                          | Disadvantages                                               | Reference |
|--------------------|----------------------------------------|-----------------------------------------------|----------------------------|----------------------------------------------------------|---------------------------------------------------------------------------|----------------------------------------------------------------------------------------|-------------------------------------------------------------|-----------|
| 1-naphthol         | Beta-Cyclodextrin                      | HPLC-fluorescence                             | $\sim 10^{-9}$ M           | Not shown                                                | Not shown although in report it stated as selective                       | Not discussed                                                                          | Long processing time, complex fabrication                   | 17        |
| 1-naphthol         | C <sub>18</sub> column                 | LC-fluorescence                               | $\sim 10^{-9}$ M           | $\sim 7 \times 10^{-8}$ M to $\sim 3 \times 10^{-6}$ M   | Not shown                                                                 | RSD $\leq 5\%$<br>Stability not discussed                                              | Long processing time, complex fabrication                   | 24        |
| 1-naphthol         | Graphene-dextran-fluorescein composite | 'Turn-On' Fluorescent Sensor                  | $\sim 10^{-11}$ M          | $\sim 10^{-10}$ M to $\sim 10^{-6}$ M                    | Selective against other molecules, ions and few Phenolic compounds tested | RSD $\leq 1\%$<br>Stable for more than six months with increase in RSD to $\sim 1.5\%$ |                                                             | This Work |
| Phenol             | Filter paper with MBTH                 | Colorimetric detection via enzymatic reaction | $\sim 10^{-6}$ M           | $\sim 10^{-6}$ M to $\sim 10^{-4}$ M                     | Not shown                                                                 | RSD $\leq 6\%$<br>Stable for three weeks with decrease in activity to 37%              | Poor sensitivity and costly                                 | 34        |
| Phenol             | Copper phosphate-enzyme hybrid         | Colorimetric detection via enzymatic reaction | $\sim 10^{-6}$ M           | $\sim 10^{-6}$ M to $\sim 10^{-4}$ M                     | Selective against other organic molecules tested                          | RSD $\leq 6\%$<br>Stable for two weeks as tested for 10 cycles.                        | Poor sensitivity, complex derivitization process and costly | 35        |
| Phenol             | Carbon paste electrode                 | Voltammetric detection                        | $\sim 10^{-6}$ M           | $\sim 2.5 \times 10^{-6}$ M to $\sim 5 \times 10^{-5}$ M | Selective against other phenolic compounds                                | Not discussed                                                                          | Poor sensitivity, complex fabrication process               | 36        |
| Phenol             | BPX-5 column                           | GC-MS and HPLC fluorescence                   | Order of microgram         | Not shown                                                | Not shown although in report it stated as selective                       | RSD $\leq 5\%$<br>Poor robustness of the system                                        | Poor sensitivity, long processing time, complex fabrication | 37        |
| Phenol             | Graphene-dextran-fluorescein composite | 'Turn-On' Fluorescent Sensor                  | $\sim 7 \times 10^{-12}$ M | $\sim 10^{-11}$ M to $\sim 10^{-6}$ M                    | Selective against other molecules, ions and few Phenolic compounds tested | RSD $\leq 1\%$<br>Stable for more than six months with increase in RSD to $\sim 1.5\%$ |                                                             | This Work |

**HPLC:** High Performance Liquid Chromatography

**LC:** Liquid Chromatography

**GC-MS:** Gas Chromatography Mass Spectroscopy

**Table S4:** List of conventional analytical techniques for quantitative detection of organic pollutants under study.

| Name of the pollutant               | Methods and materials used                                        | Source                                                                                                                                                                                      | Limit of Detection  | Applications                                                       |
|-------------------------------------|-------------------------------------------------------------------|---------------------------------------------------------------------------------------------------------------------------------------------------------------------------------------------|---------------------|--------------------------------------------------------------------|
| BPA                                 | UPLC with PDA or UV detector. C18 column                          | Methods Development Team,<br>Industrial Hygiene Chemistry Division,<br>OSHA Salt Lake Technical Centre<br>Sandy UT 84070-6406<br>(United States<br>Department of Labor,<br>Method No. 1018) | 0.041 nanogram (ng) | Applied in the sample of workplace air from which BPA is extracted |
| BPA                                 | LC/Tandem Mass Spectrometry. C8 or C18 column                     | ASTM COMPASS Designation: D7574 – 16                                                                                                                                                        | 40 ng /L            | Applied in environmental waters                                    |
| BPA                                 | HPLC with UV or FL detector. C18 column                           | Sigma Aldrich Food and Beverage analysis                                                                                                                                                    | ~ 1 µg/mL           | Applied in drinking waters                                         |
| Phenol                              | GLC with hydrogen flame ionization detector. carbowax 20-M column | ASTM COMPASS Designation: D2580 – 06                                                                                                                                                        | ~ 120 mg/L          | Applied in water samples                                           |
| Phenol                              | GC/MS Fused silica capillary column                               | National Exposure Research Laboratory, Office of Research and Development, U.S. Environmental Protection Agency, Cincinnati, Ohio 45268<br>Method: 528                                      | ~ 0.025 g/L         | Applied in drinking waters                                         |
| Phenol                              | GC with flame ionization detector                                 | United States Environment Protection Agency (EPA)<br>Method: 604                                                                                                                            | ~ 0.14 µg/L         | Applied in industrial waste water                                  |
| Picric acid and other nitro phenols | HPLC                                                              | The National Institute for Occupational Safety and Health (NIOSH), Centers for Disease Control and Prevention<br>Method: S228                                                               | ~ 0.036 µg/L        | Applied in particulate picric acid                                 |
| Picric acid                         | HPLC                                                              | U.S. Geological Survey, Open File Report No. 79-207, Menlo Park, CA, 1979                                                                                                                   | NA                  | Applied in water samples                                           |
| 1-naphthol                          | HPLC-FL detector with post column derivitization                  | United States Environment Protection Agency (EPA)<br>Method: 531.2                                                                                                                          | ~ 0.063 µg/L        | Applied in water samples                                           |

**GLC:** Gas Liquid Chromatography

**UPLC:** Ultra Performance Liquid Chromatography

**PDA:** Photo Diode Array

**FL:** Fluorescence

## Derivation of Binding constant:

One site Binding model Equation:

$$F - F_0 = (F_{\max} - F_0) \times L_0 / (K_D + L_0) \dots\dots\dots(1)$$

Where,

F = Recovered Fluorescence intensity in presence of ligands (organic pollutant)

F<sub>0</sub> = Fluorescence intensity in the absence of ligands (organic pollutant)

L<sub>0</sub> = Equilibrium concentration of the ligand (organic pollutant)

F<sub>max</sub> = Maximum recovered fluorescence intensity at equilibrium

K<sub>D</sub> = Dissociation constant

K<sub>B</sub> = Binding constant (= 1/K<sub>D</sub>)

Rearranging equation (1),

$$(F_{\max} - F_0)/(F - F_0) = K_D/L_0 + 1$$

$$\rightarrow \{(F_{\max} - F_0)/(F - F_0)\} - 1 = K_D/L_0$$

$$\rightarrow \text{Log} [\{(F_{\max} - F_0)/(F - F_0)\} - 1] = -\text{Log } L_0 + \text{Log } K_D \quad (y = mx + c)$$

F<sub>max</sub> is obtained by plotting Log L<sub>0</sub> against ΔF (F-F<sub>0</sub>)

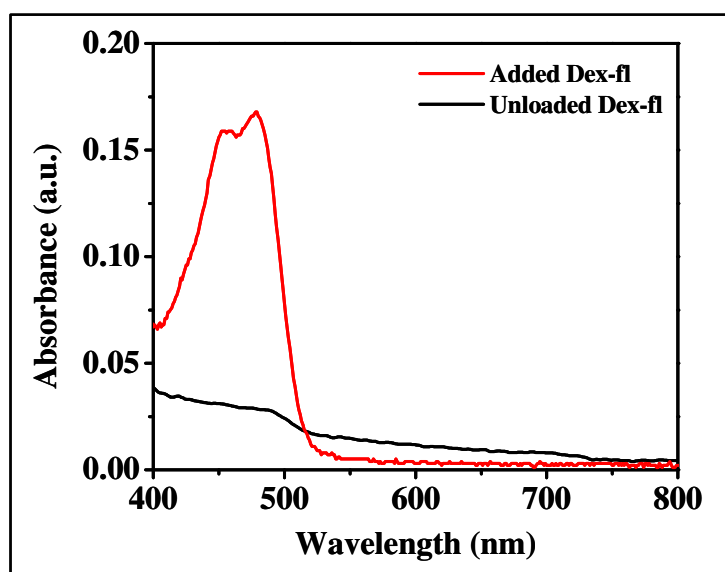

**Figure S1:** UV-Visible spectroscopy has been performed to calculate the loading of dextran-fluorescein. Here, absorbance of the added dextran-fluorescein and unloaded dextran-fluorescein has been measured after appropriate dilution. From the difference in absorbance at 490 nm of the above absorbances loaded dye amount has been calculated.

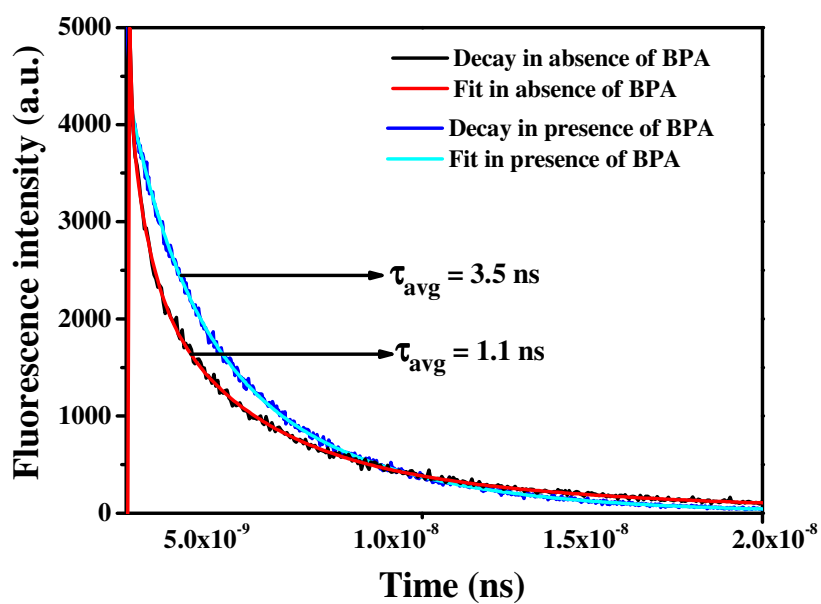

**Figure S2:** Fluorescence lifetime measurement of the composite, before and after addition of organic pollutant bisphenol A (BPA). Excitation wavelength is 405 nm. in the presence of BPA average lifetime increases due to decrease in non-radiative energy transfer.

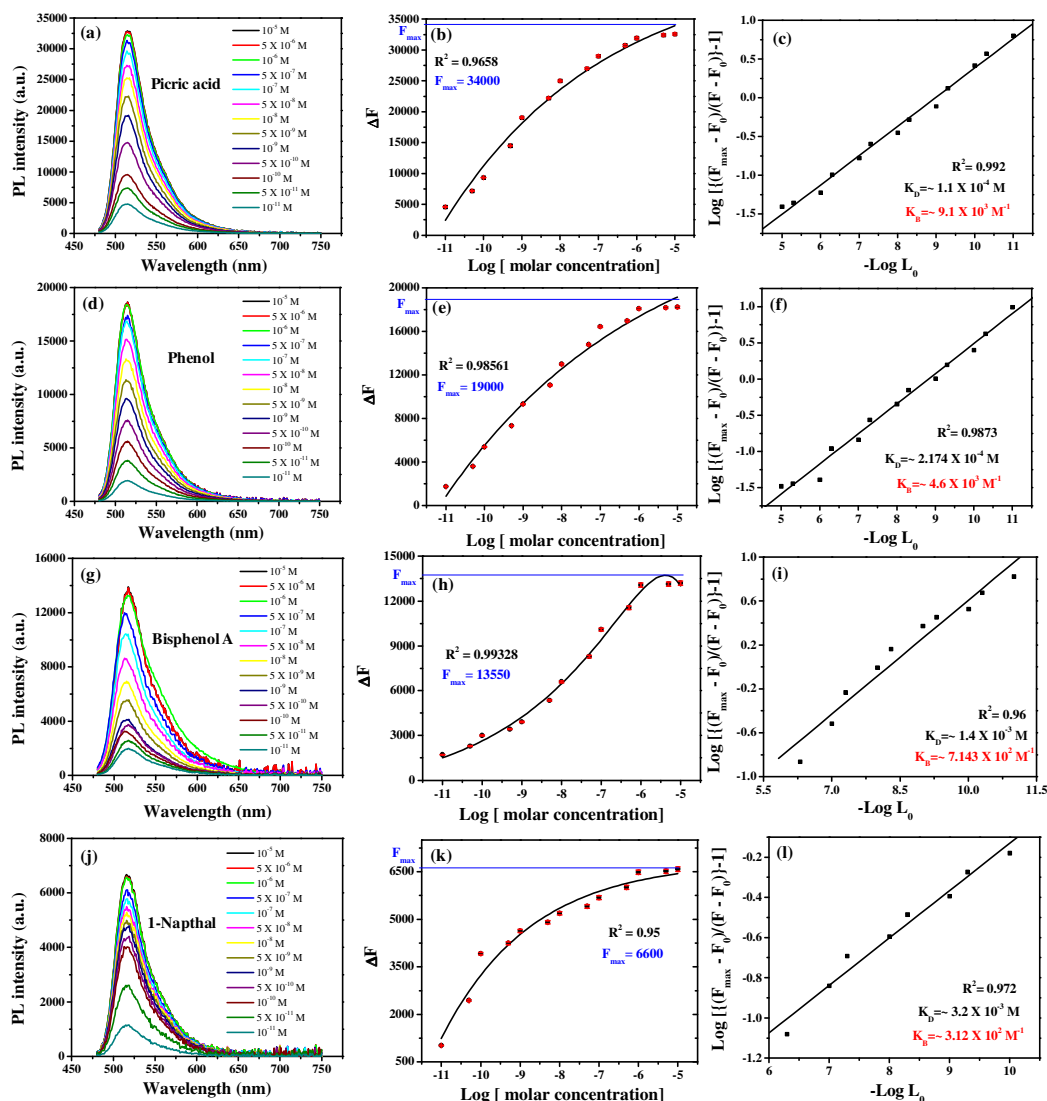

**Figure S3:** Binding constant measurement of picric acid (a-c), phenol (d-f), bisphenol A (g-i) and 1-naphthal (j-l). Recovered fluorescence is first plotted for varying concentration of pollutant (a, d, g, j), then difference in fluorescence ( $\Delta F$ ) is plotted against Logarithm of molar concentration of pollutant (b, e, h, k) to obtain  $F_{\max}$ , finally  $K_D$  is obtained from the graph according the above mentioned equation (c, f, i, l). Binding constant  $K_B$  is obtained from the value of  $K_D$ . From the measurement it has been observed that picric acid has the highest binding constant, while 1-naphthal has the lowest. Error bars are indicated in each data point.



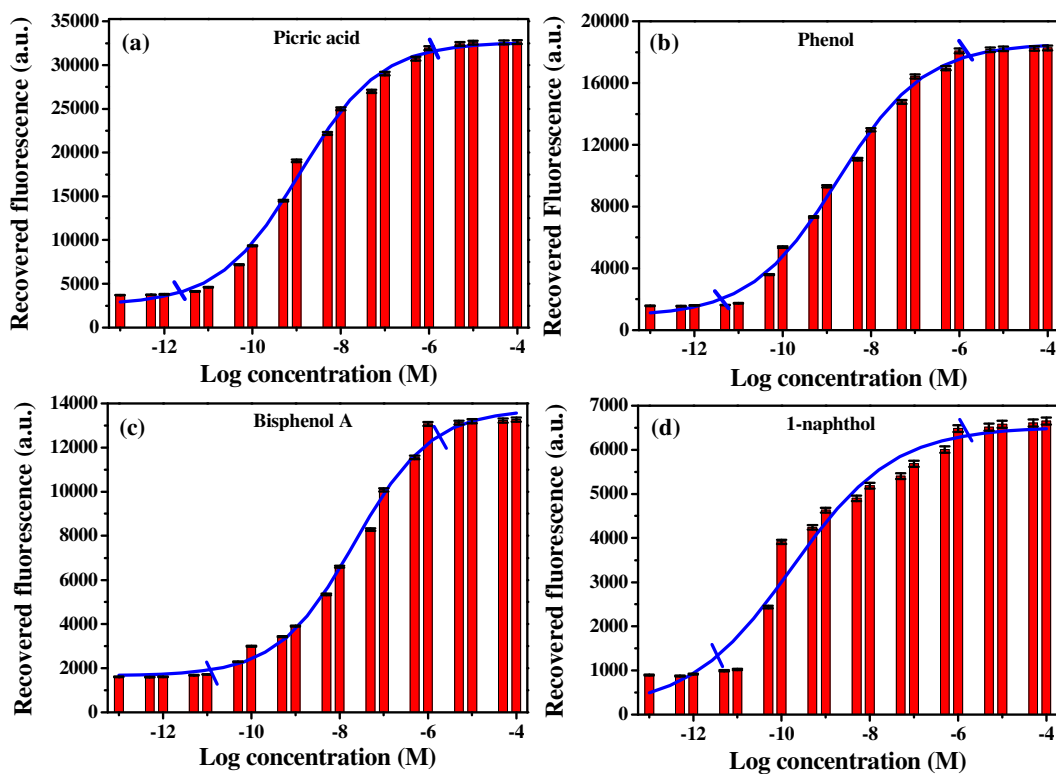

**Figure S4:** To confirm the range of detection and linearity of response all the organic pollutants are tested between  $10^{-4}$  M to  $10^{-13}$  M. The results obtained clearly indicates that practical detection of the pollutants are only possible in the range of detection. The sigmoidal plot shows that above and below the range of linearity there is no significant change in fluorescence.

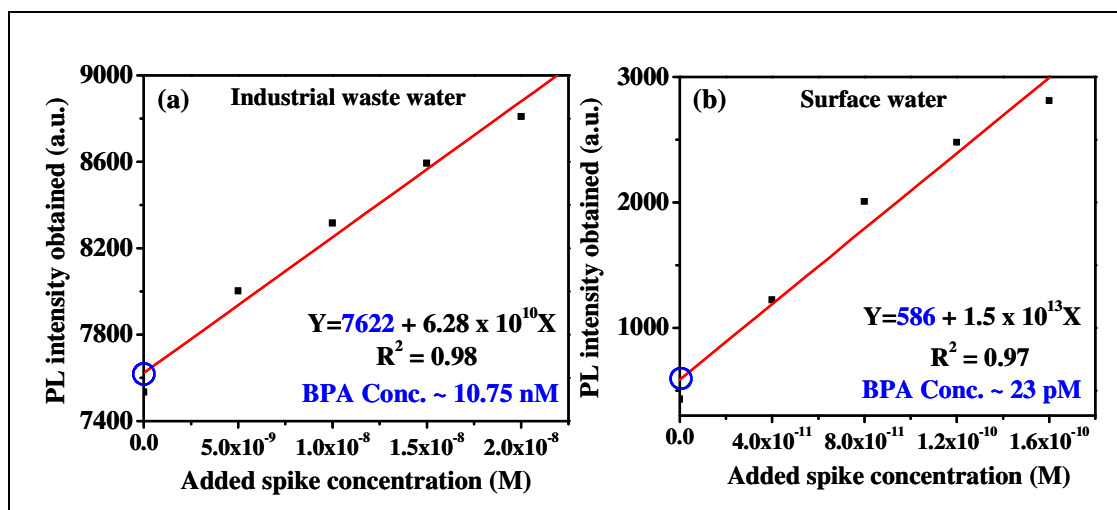

**Figure S5:** Quantitative estimation of bisphenol A in industrial waste water and surface water by standard addition method. In this method, we have used our detection approach and have found ~10.75 nM bisphenol A in industrial waste water and ~23 pM bisphenol A in surface water.

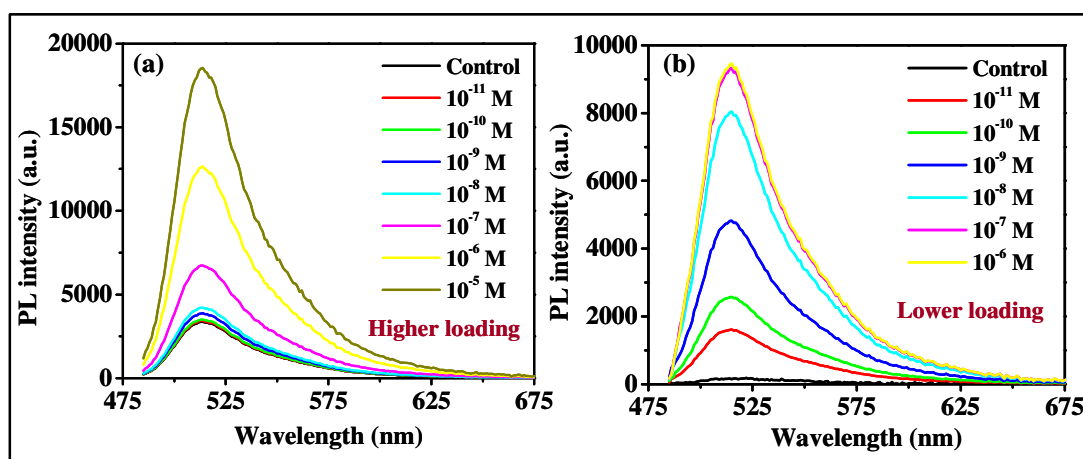

**Figure S6:** To optimize the loading concentration we have tried both higher (~60 μM / 5 mg composite) and lower loading conditions (~5 μM / 5 mg composite). Bisphenol A has been studied as organic pollutant. In case of higher loading (a) high background signal diminishes its performance especially in the lower range of detection. Lower loading (b) limits its detection sensitivity especially in the upper range of detection.

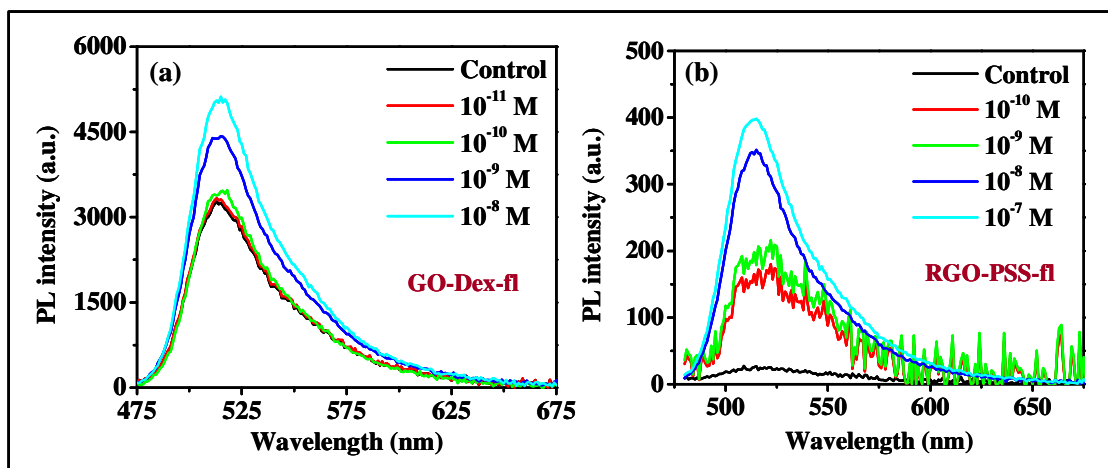

**Figure S7:** Two control composites have been tested for bisphenol A detection. In graphene oxide-dextran fluorescein composite (GO-Dex-fl) diminished sensitivity has been observed due to high background signal results from inefficient fluorescence quenching of the fluorophore (a). In the other composite (RGO-PSS-fl) also poor sensitivity observed (b). Here the fluorophore strongly binds with the composite surface results in inefficient fluorescence recovery.

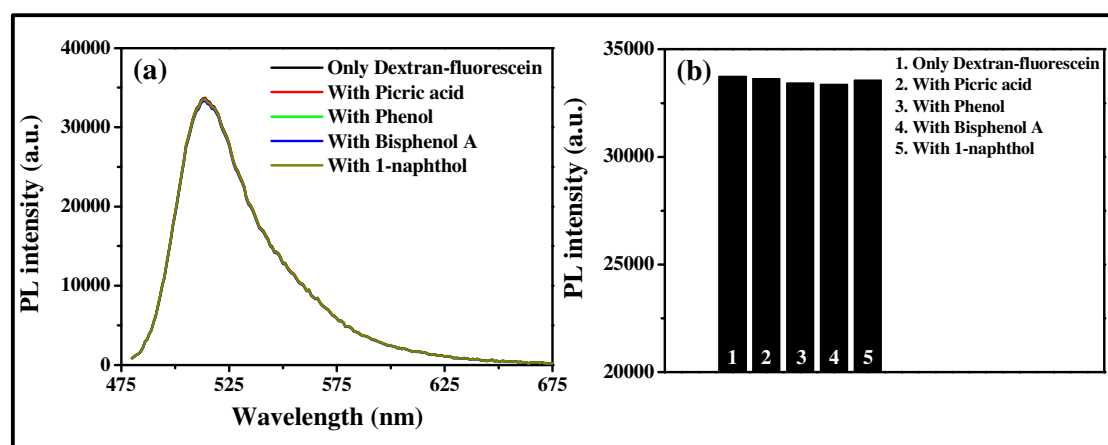

**Figure S8:** Control experiments have been performed to test the role of graphene oxide (GO) in the detection approach. The experiments were performed in the absence of GO, keeping all other parameters same. All the organic pollutants tested have  $10^{-8}$  M concentration. Without GO, there is no significant quenching of dex-fl was recorded in presence of organic pollutants. PSS also have found negligible effect on the fluorescence of dex-fl. (a) The results are shown in bar diagram for better understanding of the effect of GO in the detection approach.

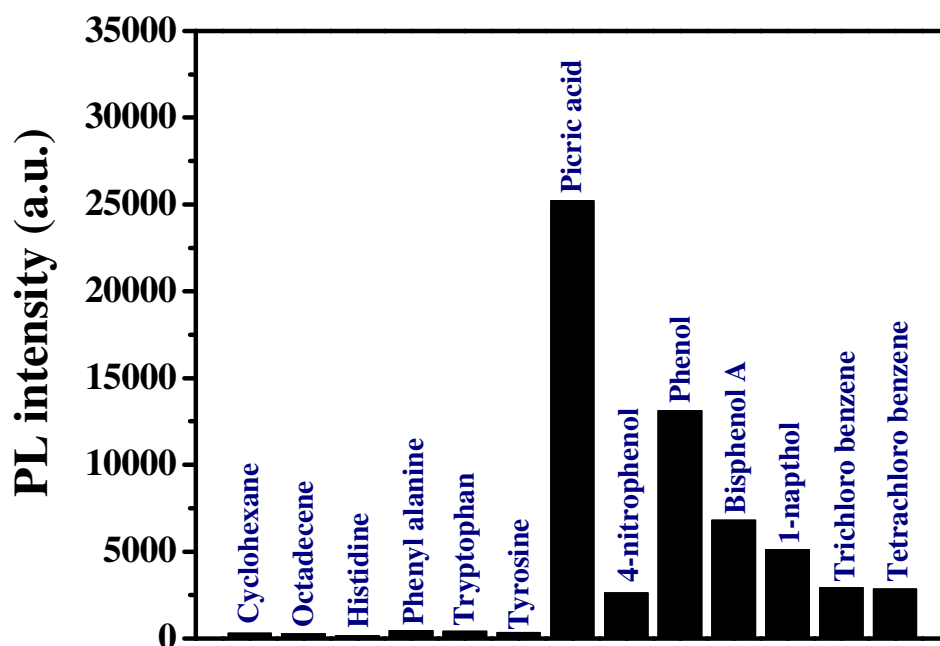

**Figure S9:** Control experiments have been performed to test the sensitivity of the detection approach. It has been found that common organic solvents or lipophilic amino acids do not respond in this approach. Only the organic pollutants tested respond in this approach. This data also demonstrate different sensitivity of different organic pollutants towards this approach due to varying extent of interaction with the detection probe. Polychloro benzenes (PCBs) and 4-nitrophenol were also tested for interference by this approach since these molecules present in water samples as common organic pollutants. All the samples tested have  $10^{-8}$  M concentration.

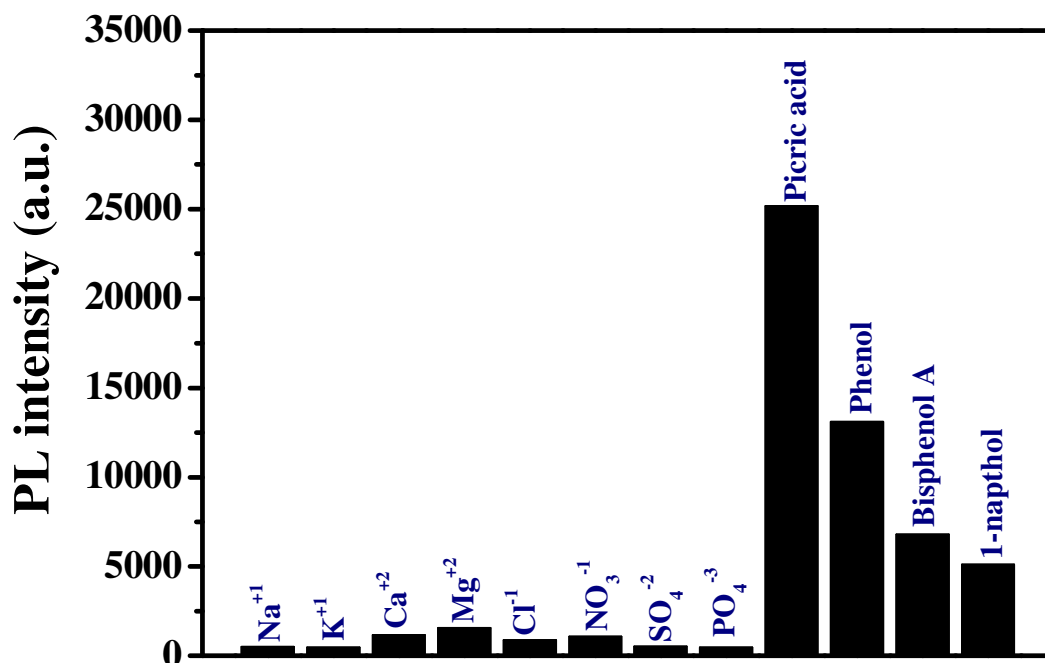

**Figure S10:** Control experiments have been performed with common ions generally present in water samples. It has been found that these ions do not have any significant interference in the detection approach. All the ions tested have  $10^{-7}$  M concentration.

### **Calculation for the estimation of dye loading:**

5 mg composite sample (RGPD-fl) first dissolved in water (pH ~9.0 with carbonate-bicarbonate buffer). Precipitation redispersion method followed to completely precipitate the composite sample. The supernatant containing unloaded dye was collected and absorbance measured by appropriate dilution (B). Known concentration of dye has been added to RGO-PSS composite (A).

Absorbance of total added dye (A): 0.167 (10 times dilute)

Absorbance of unloaded dye (B): 0.028 (10 times dilute)

Thus, absorbance of loaded dye: 0.139

Molar extinction coefficient of FITC-Dex:  $\sim 75,000 \text{ M}^{-1}\text{cm}^{-1}$

(Assuming same as fluorescein dye)

$$A = \epsilon cl$$

$$c = A/\epsilon l$$

$$A = 0.139$$

$$l = 1 \text{ cm}$$

$$\epsilon = 75,000 \text{ M}^{-1}\text{cm}^{-1}$$

$$c = 1.85 \times 10^{-6} \text{ Molar}$$

Since, the loading experiment has been done by diluting 10 times of all the solution, the final concentration of loaded dye is  $\sim 20 \mu\text{M}$ .

### **Standard addition method for quantitative bisphenol A detection:**

This method is well known and commonly employed in quantitative detections routinely. We have collected industrial waste water, surface water and packaged drinking water from different sources. The sample waters were first centrifuged at

10000 rpm (5 minutes) and the supernatant collected followed by filtering with Whatman 40 filter paper to remove dust and agglomerated impurities. Next, the filtrate was concentrated 5 times the original volume by boiling. Next five different batches with 1 ml sample each was prepared followed by addition of spike solution by varying volumes in those batches. Final spike concentration has been calculated since added spike concentration is known. Next the batches were treated with the composite probe (RGPD-fl) and recovered fluorescence was measured. Obtained fluorescence was then plotted with the final spike concentration. From the intercept in the y axis, we calculate the exact concentration of the bisphenol A in the given sample (Figure S2). Packaged drinking water estimation could not be performed in this approach since it is beyond the linearity range of this approach.
